# Supplementary material
Source: PubMed Central journal article supplement (PMC4235840)
Supplement: 13238_2014_93_MOESM2_ESM.pdf [file 13238_2014_93_MOESM2_ESM.pdf]

## Supplementary Figures Legends and Tables

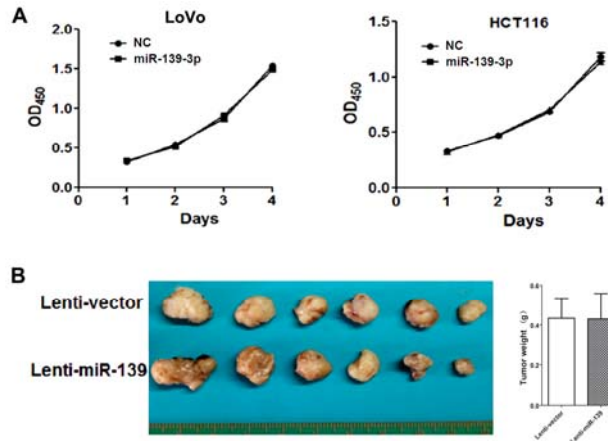

**Figure S1. miR-139-5p showed no significant effect on CRC cell growth.** (A) miR-139-5p overexpression showed no significant effect on the cell proliferation in LoVo and HCT-116 cells. (B) The effect of miR-139 on tumor formation in a nude mouse xenograft model. LoVo cells ( $2 \times 10^6$ ) stably expressing miR-139 or the control were injected s.c. into the right flank of each nude mouse.

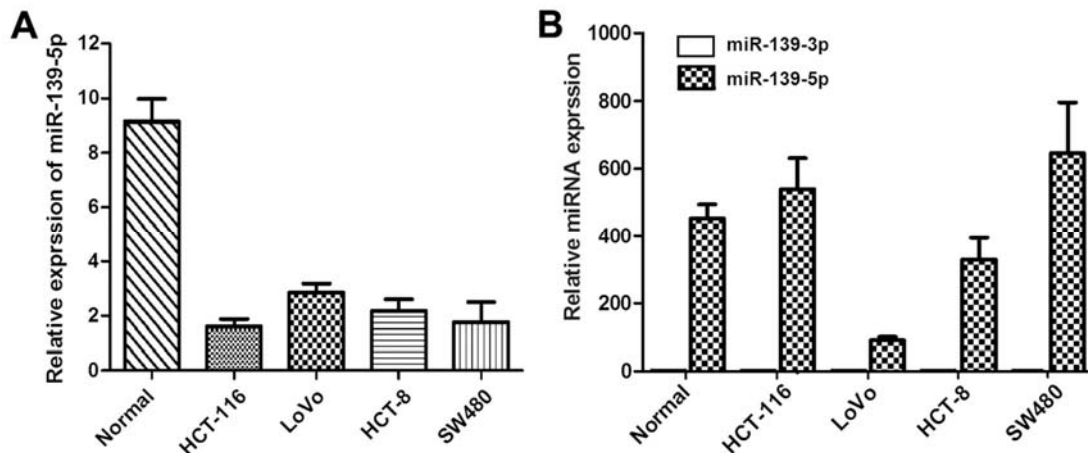

**Figure S2. Expression of miR-139 in CRC cells.** (A) The expression of miR-139-5p in CRC cells and tissues. Five samples of normal colon epithelium mucosae were pooled and subjected to quantitation of miR-139-5p expression (Normal). (B) The relative expression of miR-139-3p in 4 different CRC cells and normal tissue was much lower than that of miR-139-5p. The expression of miR-139-3p was set as 1.

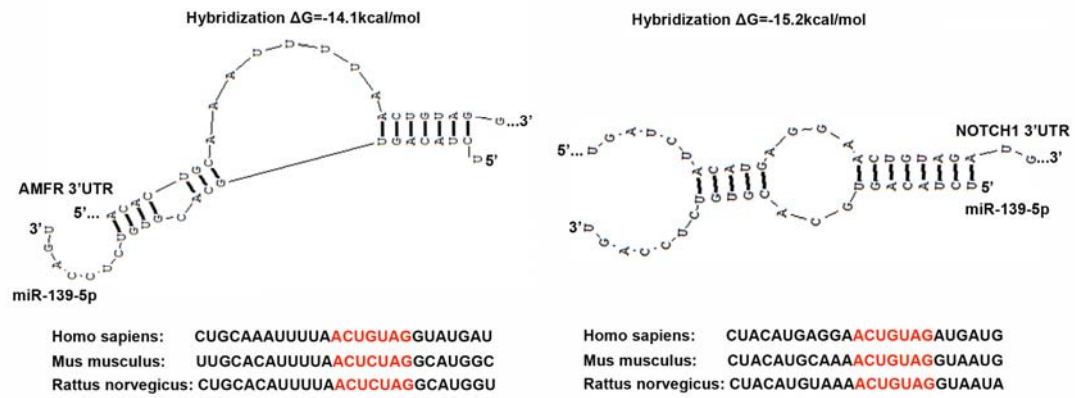

**Figure S3.** The predicted binding site of miR-139-5p in the 3'UTRs of AMFR and NOTCH1 is conserved among mammals.

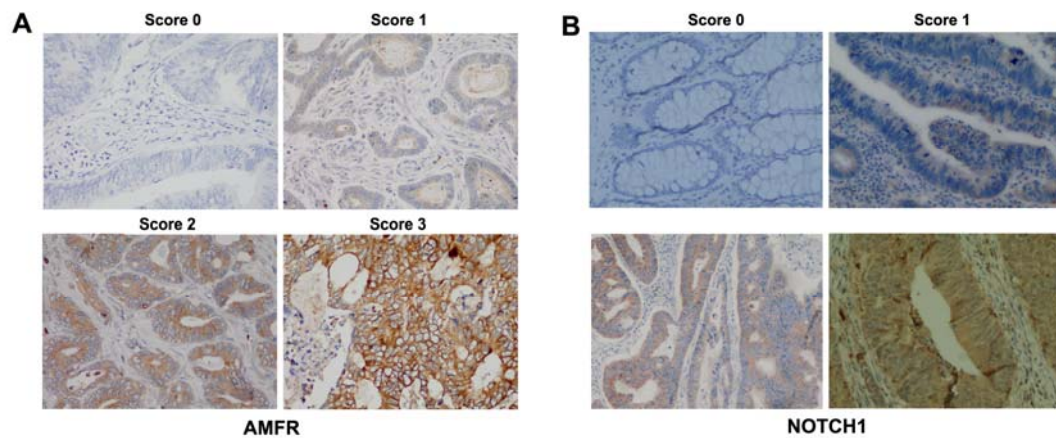

**Figure S4.** Immunohistochemical staining of AMFR and NOTCH1 in the CRC and NCT samples. The scores (0, 1, 2 and 3) are based on the intensity of the brown staining.

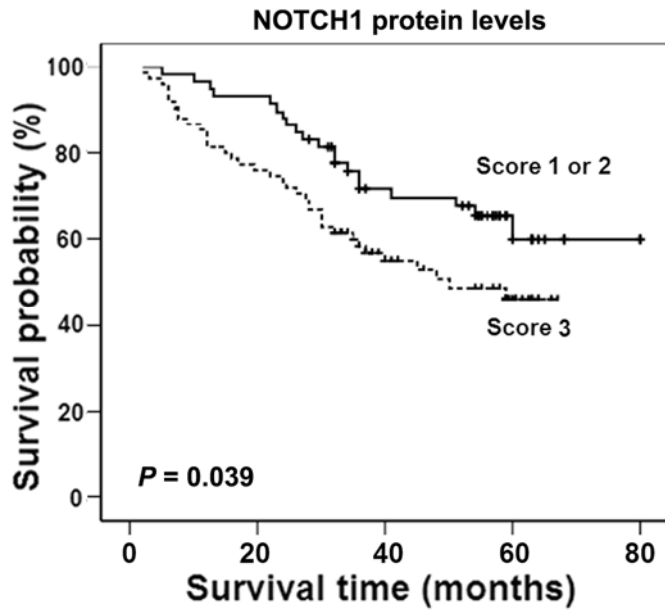

**Figure S5.** Survival analysis based on the NOTCH1 protein expression. The groups were ranked according to the NOTCH1 staining intensity.

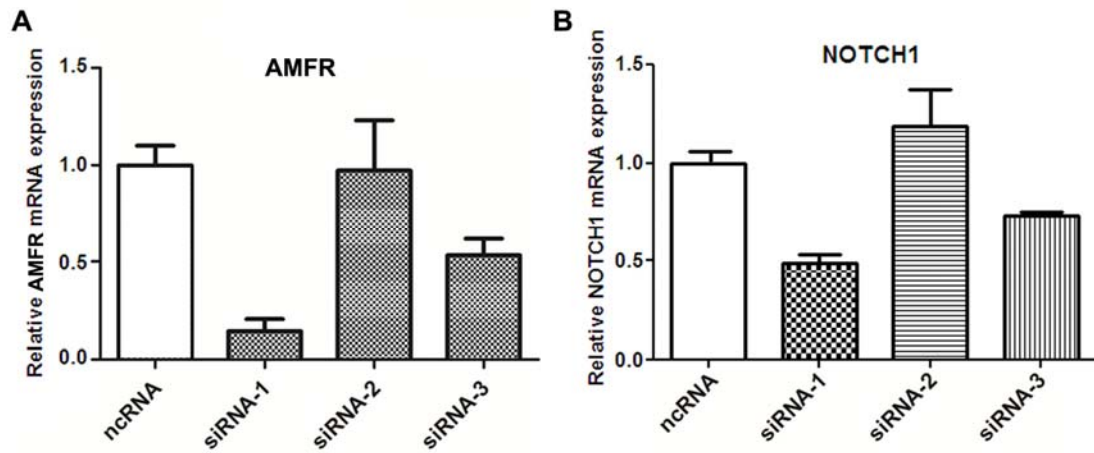

**Figure S6.** The knockdown of AMFR and NOTCH1 in CRC cells. The mRNA levels of AMFR and NOTCH1 were determined by qRT-PCR in LoVo cells transfected with si-AMFR, si-NOTCH1, or si-control (ncRNA). Beta-actin served as an internal control. The most effective siRNA (1#) was selected out for further investigation.

**Table S1. Cox multivariate analyses for overall survival**

| Variables                            | Overall survival |             | P value    |
|--------------------------------------|------------------|-------------|------------|
|                                      | HR               | 95%CI       |            |
| Age ( $\geq 58$ vs. $< 58$ )         | 1.044            | 0.616-1.771 | 0.873      |
| Gender (female vs. male)             | 0.587            | 0.341-1.011 | 0.055      |
| Tumor size ( $\geq 5$ cm vs. $< 5$ ) | 1.031            | 0.610-1.743 | 0.908      |
| Grading (G3 vs. G1-2)                | 1.927            | 1.080-3.440 | 0.026      |
| TNM stage(III+IV vs. I+II)           | 4.225            | 2.861-6.239 | $< 0.0001$ |
| miR-139-5p levels(high vs. low)      | 2.681            | 1.532-4.691 | 0.001      |

HR:hazard ratio; CI:confidence interval; TNM: tumor-node-metastasis classifications.

**Table S2. Lung metastases in the mouse models of pulmonary metastasis**

| No.   | Lung metastases |               |
|-------|-----------------|---------------|
|       | Lenti-vector    | Lenti-miR-139 |
| 1     | 2               | 0             |
| 2     | 1               | 1             |
| 3     | 1               | 0             |
| 4     | 0               | 1             |
| 5     | 2               | 0             |
| 6     | 5               | 0             |
| 7     | 2               | 2             |
| 8     | 2               | 1             |
| 9     | 3               | 0             |
| 10    | 1               | 1             |
| Total | 19              | 6             |

**Table S4. Patients' information**

| Characteristics  | Colorectal cancer*<br>(n=158) | Colorectal cancer#<br>(n=134) |
|------------------|-------------------------------|-------------------------------|
| Gender           |                               |                               |
| Male             | 93                            | 74                            |
| Female           | 65                            | 60                            |
| Age at diagnosis |                               |                               |
| $\geq 58$        | 80                            | 69                            |
| $< 58$           | 78                            | 65                            |
| TNM stage        |                               |                               |
| I                | 22                            | 18                            |
| II               | 48                            | 39                            |
| III              | 67                            | 58                            |
| IV               | 21                            | 19                            |
| Nodal status     |                               |                               |
| Positive         | 86                            | 45                            |
| Negative         | 72                            | 38                            |
| Tumor size (cm)  |                               |                               |
| $< 5$            | 96                            | 84                            |
| $\geq 5$         | 62                            | 50                            |
| Tumor location   |                               |                               |
| Rectum           | 72                            | 57                            |
| Distal colon     | 37                            | 34                            |
| Proximal colon   | 49                            | 43                            |
| Grading          |                               |                               |
| G1               | 6                             | 6                             |
| G2               | 124                           | 105                           |
| G3               | 28                            | 23                            |

\*: Of these 158 cases, matched frozen noncancerous tissues were available in 80 cases.

#: Of these 158 cases, the data of miR-139-5p, AMFR and NOTCH1 expression were available in 134 cases.

**Table S5. Primer sequences**

| Primers                                    | Sequence (5' to 3')           | Products length |
|--------------------------------------------|-------------------------------|-----------------|
| <b>Primers for pri-miR-139 cloning</b>     |                               |                 |
|                                            | GGTGAGGGACTGAGGTGAT           | 890             |
|                                            | CAGGGTTTCTGATACAGTAGGT        |                 |
| miR-139-5p-F                               | CGACGCGTCCCTCTTCCCATTCCTC     | 756             |
| miR-139-5p-R                               | CCGGAATTCGAGACCCACTGACACTATCT |                 |
| <b>Real time PCR Primers</b>               |                               |                 |
| AMFR-F                                     | TCCAAGGCAGGTAGGTTCA           | 259             |
| AMFR-R                                     | GGAGTGGTTAGGCAGCAAG           |                 |
| NOTCH1-F                                   | GCAGTCAGGCGTGTGTTGTC          | 147             |
| NOTCH1-R                                   | GGCACTTTCTGTGAGGAGGA          |                 |
| $\beta$ -actin-F                           | AGTGTGACGTGGACATCCGCAAAG      | 220             |
| $\beta$ -actin-R                           | ATCCACATCTGCTGGAAGGTGGAC      |                 |
| <b>3'UTR primer</b>                        |                               |                 |
| LAPTM4B-Out-F                              | ATACGGCAACTGCCTCCTA           | 883             |
| LAPTM4B-Out-R                              | CTGGTGCTTTCTAATGGTCTT         |                 |
| LAPTM4B-In-F                               | GGGGTACCAACTCCTCTGATGTCCTGGTT | 528             |
| LAPTM4B-In-R                               | CGGGATCCCTATGCTGGAATGGCTGAA   |                 |
| HNRNPF-Out-F                               | CTTCAGTGTTCCTCATGCAA          | 863             |
| HNRNPF-Out-R                               | TCACCATTCCACCATTCA            |                 |
| HNRNPF-In-F                                | CGGAATTCCTTTTACACCACATCACAG   | 630             |
| HNRNPF-In-R                                | CGGGATCCACTTTTATTTAGCCTCATCA  |                 |
| TOP1-Out-F                                 | GCTACTGTATGCAAAGT             | 852             |
| TOP1-Out-R                                 | CCATTAAGTTGTAGGAA             |                 |
| TOP1-In-F                                  | GGGGTACCCCTAATCTTTCACTTG      | 341             |
| TOP1-In-R                                  | CGGGATCCCATTAAGTTGTAGGAATT    |                 |
| AMFR-Out-F                                 | CAGCGTAAGGACGAACTCC           | 1536            |
| AMFR-Out-R                                 | TTCCACAACAACGACAGCA           |                 |
| AMFR-In-F                                  | CGGAATTCCTGGTCTTATAGTGTGGACA  | 1277            |
| AMFR-In-R                                  | CGGGATCCCAACGACAGCAGTTTGATA   |                 |
| AMFR-M-F                                   | CGGAATTCCTGGTCTTAGCACTTTTGACA | 204             |
| AMFR-M-R                                   | CGGGATCCCAACGACAGCAGTTTGATA   | 196             |
| NOTCH1-Out-F                               | GTTCTTGAATGTAGGCATCA          | 900             |
| NOTCH1-Out-R                               | CTCCCTCAGAGCATAGCAG           |                 |
| NOTCH1-In-F                                | CGGAATTCCTAGGAGACTTGCCAGAGCC  | 591             |
| NOTCH1-In-R                                | CGGGATCCCTGGAAGCCAGATCACCATC  |                 |
| NOTCH1-M-F                                 | CGGAATTCCTAGGACATTTGCCAGAGCC  | 198             |
| NOTCH1-M-R                                 | CGGGATCCCTGGAAGCCAGATCACCATC  | 121             |
| <b>Primers for the cloning of AMFR ORF</b> |                               |                 |
| AMFR-ORF-Out-F                             | CCTGGGGGCCAGAGGTC             | 2221            |
| AMFR-ORF-Out-R                             | ATGCAGGAGCACCAGAGTTC          |                 |

|               |                                                       |      |
|---------------|-------------------------------------------------------|------|
| AMFR-ORF-In-F | ATAGGATCCCGCCATGCCGCTGCTCTTC                          | 2031 |
| AMFR-ORF-In-R | ATGGA <u>ACTAGT</u> AGAAATTGGGACAGGCCTCC<br>TCCAGTCAG |      |
